# Supplementary material for: Health worker perspectives on barriers to delivery of routine tuberculosis diagnostic evaluation services in Uganda: a qualitative study to guide clinic-based interventions
Source: PubMed Central journal article supplement (PMC4307676; doi:10.1186/s12913-014-0668-0), 2015-01-22
Supplement: 12913_2014_668_MOESM1_ESM.pdf [file 12913_2014_668_MOESM1_ESM.pdf]

| Domains of barriers to TB care |                                                                                                                                                                                                                                                                                                                                                                                                                                                                                                                                                                                                                                                                                                                                                                                                                                                                                                                                                                     |
|--------------------------------|---------------------------------------------------------------------------------------------------------------------------------------------------------------------------------------------------------------------------------------------------------------------------------------------------------------------------------------------------------------------------------------------------------------------------------------------------------------------------------------------------------------------------------------------------------------------------------------------------------------------------------------------------------------------------------------------------------------------------------------------------------------------------------------------------------------------------------------------------------------------------------------------------------------------------------------------------------------------|
| I.                             | Economic barriers                                                                                                                                                                                                                                                                                                                                                                                                                                                                                                                                                                                                                                                                                                                                                                                                                                                                                                                                                   |
|                                | <ul style="list-style-type: none"> <li>a. Health services costs <ul style="list-style-type: none"> <li>i. User fees for health services</li> <li>ii. Required purchases (<i>i.e.</i> drugs, supplies, etc.)</li> </ul> </li> <li>b. Access to services <ul style="list-style-type: none"> <li>i. Transportation to health services</li> <li>ii. Accommodation while seeking health services</li> <li>iii. Subsistence while seeking services</li> </ul> </li> <li>c. Opportunity costs <ul style="list-style-type: none"> <li>i. Lost income while seeking health services</li> <li>ii. Lost productivity while seeking health services</li> <li>iii. Lost time while seeking health services</li> </ul> </li> </ul>                                                                                                                                                                                                                                                |
| II.                            | Geographic barriers                                                                                                                                                                                                                                                                                                                                                                                                                                                                                                                                                                                                                                                                                                                                                                                                                                                                                                                                                 |
|                                | <ul style="list-style-type: none"> <li>a. Remoteness of patients from health services</li> <li>b. Terrain/climate impeding access to health services</li> </ul>                                                                                                                                                                                                                                                                                                                                                                                                                                                                                                                                                                                                                                                                                                                                                                                                     |
| III.                           | Social/cultural barriers                                                                                                                                                                                                                                                                                                                                                                                                                                                                                                                                                                                                                                                                                                                                                                                                                                                                                                                                            |
|                                | <ul style="list-style-type: none"> <li>a. Stigma <ul style="list-style-type: none"> <li>i. Disease-related (HIV, TB, etc.) stigma</li> <li>ii. Poverty/class/gender-related stigma</li> </ul> </li> <li>b. Health illiteracy and related behavior <ul style="list-style-type: none"> <li>i. TB-related illiteracy</li> <li>ii. General health and hygiene-related illiteracy</li> </ul> </li> <li>c. Lack of knowledge about health services</li> <li>d. Traditional beliefs and practices <ul style="list-style-type: none"> <li>i. Traditional health-related beliefs</li> <li>ii. Utilization of traditional health services</li> </ul> </li> </ul>                                                                                                                                                                                                                                                                                                              |
| IV.                            | Health status barriers                                                                                                                                                                                                                                                                                                                                                                                                                                                                                                                                                                                                                                                                                                                                                                                                                                                                                                                                              |
|                                | <ul style="list-style-type: none"> <li>a. TB disease severity</li> <li>b. Disease co-infection (HIV, etc.)</li> <li>c. Diagnosing difficulty due to prevalence of other infections with overlapping symptoms (malaria, HIV, etc.)</li> </ul>                                                                                                                                                                                                                                                                                                                                                                                                                                                                                                                                                                                                                                                                                                                        |
| V.                             | Health system barriers                                                                                                                                                                                                                                                                                                                                                                                                                                                                                                                                                                                                                                                                                                                                                                                                                                                                                                                                              |
|                                | <ul style="list-style-type: none"> <li>a. Resources <ul style="list-style-type: none"> <li>i. Drugs</li> <li>ii. Supplies</li> <li>iii. Infrastructure</li> <li>iv. Government support</li> <li>v. Biohazard safeguards for staff</li> </ul> </li> <li>b. Human resources <ul style="list-style-type: none"> <li>i. Training of staff</li> <li>ii. Workload faced by staff</li> <li>iii. Reliability and motivation of staff</li> </ul> </li> <li>c. Specific service implementation <ul style="list-style-type: none"> <li>i. TB-suspect screening</li> <li>ii. Sample collection and evaluation</li> <li>iii. Counseling and patient education</li> </ul> </li> <li>d. Coordination and administration of services <ul style="list-style-type: none"> <li>i. Staff allocation among services</li> <li>ii. Clinic leadership</li> <li>iii. Communication and coordination between services</li> <li>iv. Patient navigation through services</li> </ul> </li> </ul> |

- v. Capacity for patient follow-up and community outreach
- vi. Referrals
- vii. Record keeping
